# Supplementary material
Source: publisher site journal article supplement (https://www.dovepress.com/article/397671)
Supplement: Supplementary file 1 [file get_supplementary_file.php]

## Supplementary Information Table of Contents:

1. **Table S1.** Canadian-specific Facility-level Model Inputs
2. **Figure S1.** Sensitivity of Custom Pak® Budget Impacts to Task-Assignment Changes for Cataract Procedures in a Community Hospital
3. **Figure S2.** Sensitivity of Custom Pak Budget Impacts to Task-Assignment Changes for Retina Procedures in a Community Hospital
4. **Figure S3.** Sensitivity of Custom Pak Budget Impacts to Number of Personnel Changes for Cataract Procedures in a Community Hospital
5. **Figure S4.** Sensitivity of Custom Pak Budget Impacts to Number of Personnel Changes for Retina Procedures in a Community Hospital
6. **Figure S5.** Sensitivity of Custom Pak Budget Impacts to Changes in All Costs for Cataract Procedures in a Community Hospital
7. **Figure S6.** Sensitivity of Custom Pak Budget Impacts to Changes in All Costs for Retina Procedures in a Community Hospital

**Table S1.** Canadian-specific Facility-level Model Inputs

| <b>Variable</b>                                                    | <b>Model input</b>                                                                                                     |                           |
|--------------------------------------------------------------------|------------------------------------------------------------------------------------------------------------------------|---------------------------|
| Reimbursement rate of OR time                                      | Cataract: \$605.00 (in 2018 CAD) / procedure <sup>1</sup><br>Retina: \$2,500 (in 2018 CAD) / procedure <sup>1</sup>    |                           |
| Ophthalmologist average reimbursement rate                         | Cataract: \$398.00 (in 2018 CAD) / procedure <sup>2</sup><br>Retina: \$2,390.00 (in 2018 CAD) / procedure <sup>2</sup> |                           |
| Hours worked per year per employee (assumes full-time, hours/year) | 1,950 <sup>3</sup>                                                                                                     |                           |
| <b>Job title</b>                                                   | <b>Assigned tasks</b>                                                                                                  | <b>Salary<sup>4</sup></b> |
| Purchasing agent                                                   | Negotiating surgical supply prices, paying surgical supply invoices                                                    | \$50,681.00               |
| Unit Aide                                                          | Placing surgical supply orders, receiving surgical supplies, stocking surgical supplies, pulling surgical supplies     | \$42,081.00               |
| Registered Nurse                                                   | Verifying surgical supply invoices                                                                                     | \$71,350.00               |
| Registered Practical Nurse                                         | Preparing surgical supplies                                                                                            | \$54,327.00               |

<sup>1</sup>Ontario Ministry of Health. Call for Applications to License Independent Health Facilities for the Provision of Cataract Surgeries in Ontario. Application Guidelines. Government of Canada January 15, 2020.

<sup>2</sup>Ontario Ministry of Health. Schedule of Benefits. Physician Services Under the Health Insurance Act. March 19, 2020.

<sup>3</sup>Statistics Canada. Table 14-10-0043-01. Average usual and actual hours worked in a reference week by type of work (full- and part-time), annual [Available from: <https://www150.statcan.gc.ca/t1/tbl1/en/tv.action?pid=1410004301> Accessed February 12, 2021.

<sup>4</sup>Statistics Canada. Table 14-10-0307-01 Employee wages by occupation, annual, inactive. [Available from: <https://www150.statcan.gc.ca/t1/tbl1/en/tv.action?pid=1410030701>. Accessed February 12, 2021.

**Figure S1. Sensitivity of Custom Pak® Budget Impacts to Task-Assignment Changes for Cataract Procedures in a Community Hospital**

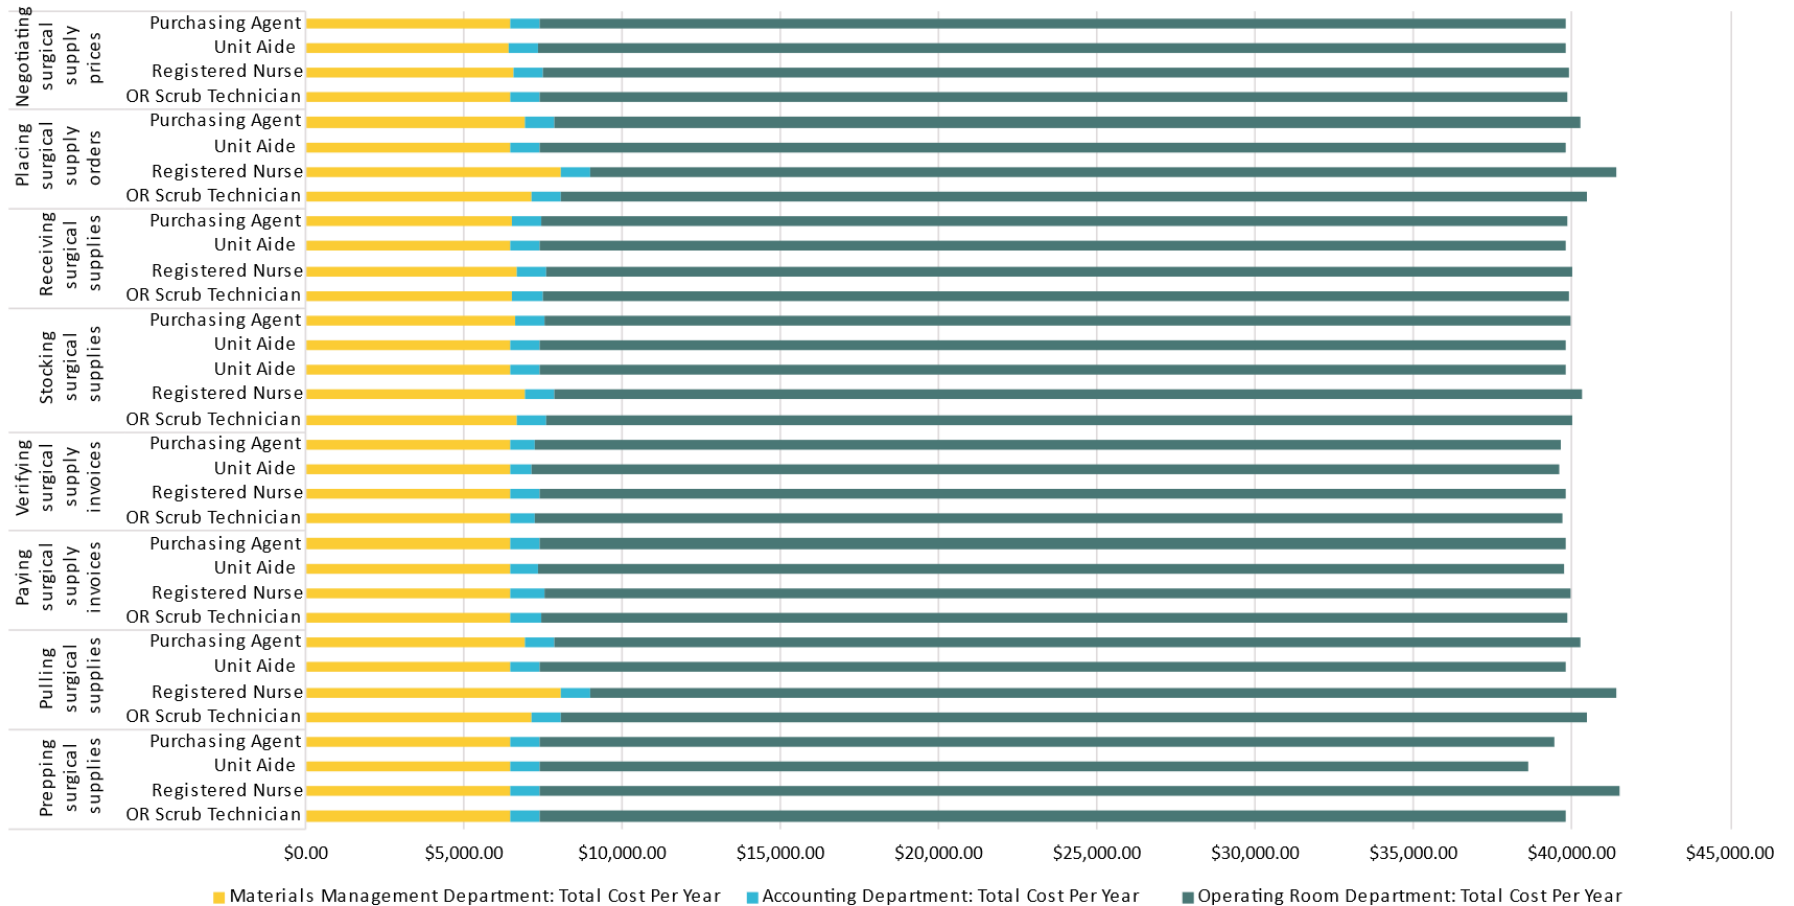

Notes: As task-assignment changes, hidden cost savings from Custom Pak usage in cataract surgery stay relatively stable. The variability seen shows that savings increase as the salary of the person assigned the task increases: holding time savings constant, cost savings are a direct function of salary.

**Figure S2. Sensitivity of Custom Pak Budget Impacts to Task-Assignment Changes for Retina Procedures in a Community Hospital**

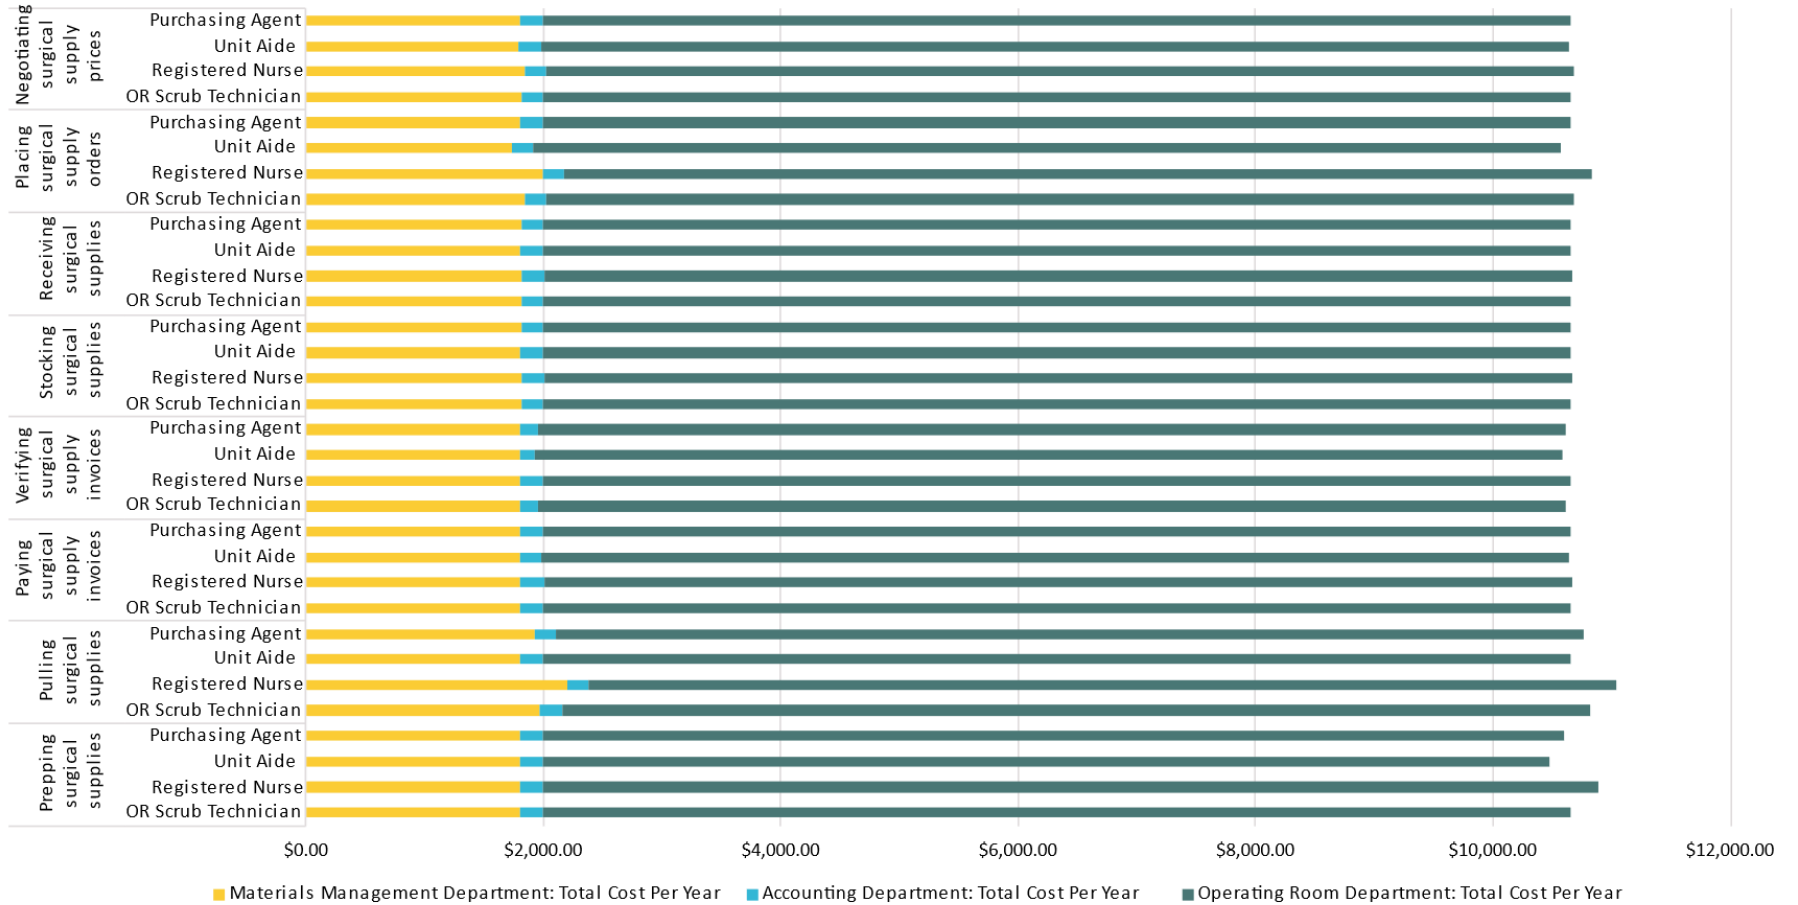

Notes: Hidden cost savings accrued from using Custom Pak in surgical retina procedures have low sensitivity as tasks are assigned to different roles. Pulling surgical supplies is the most sensitive task for Materials Management, while preparing surgical supplies is the most sensitive for the Operating room.

**Figure S3. Sensitivity of Custom Pak Budget Impacts to Number of Personnel Changes for Cataract Procedures in a Community Hospital**

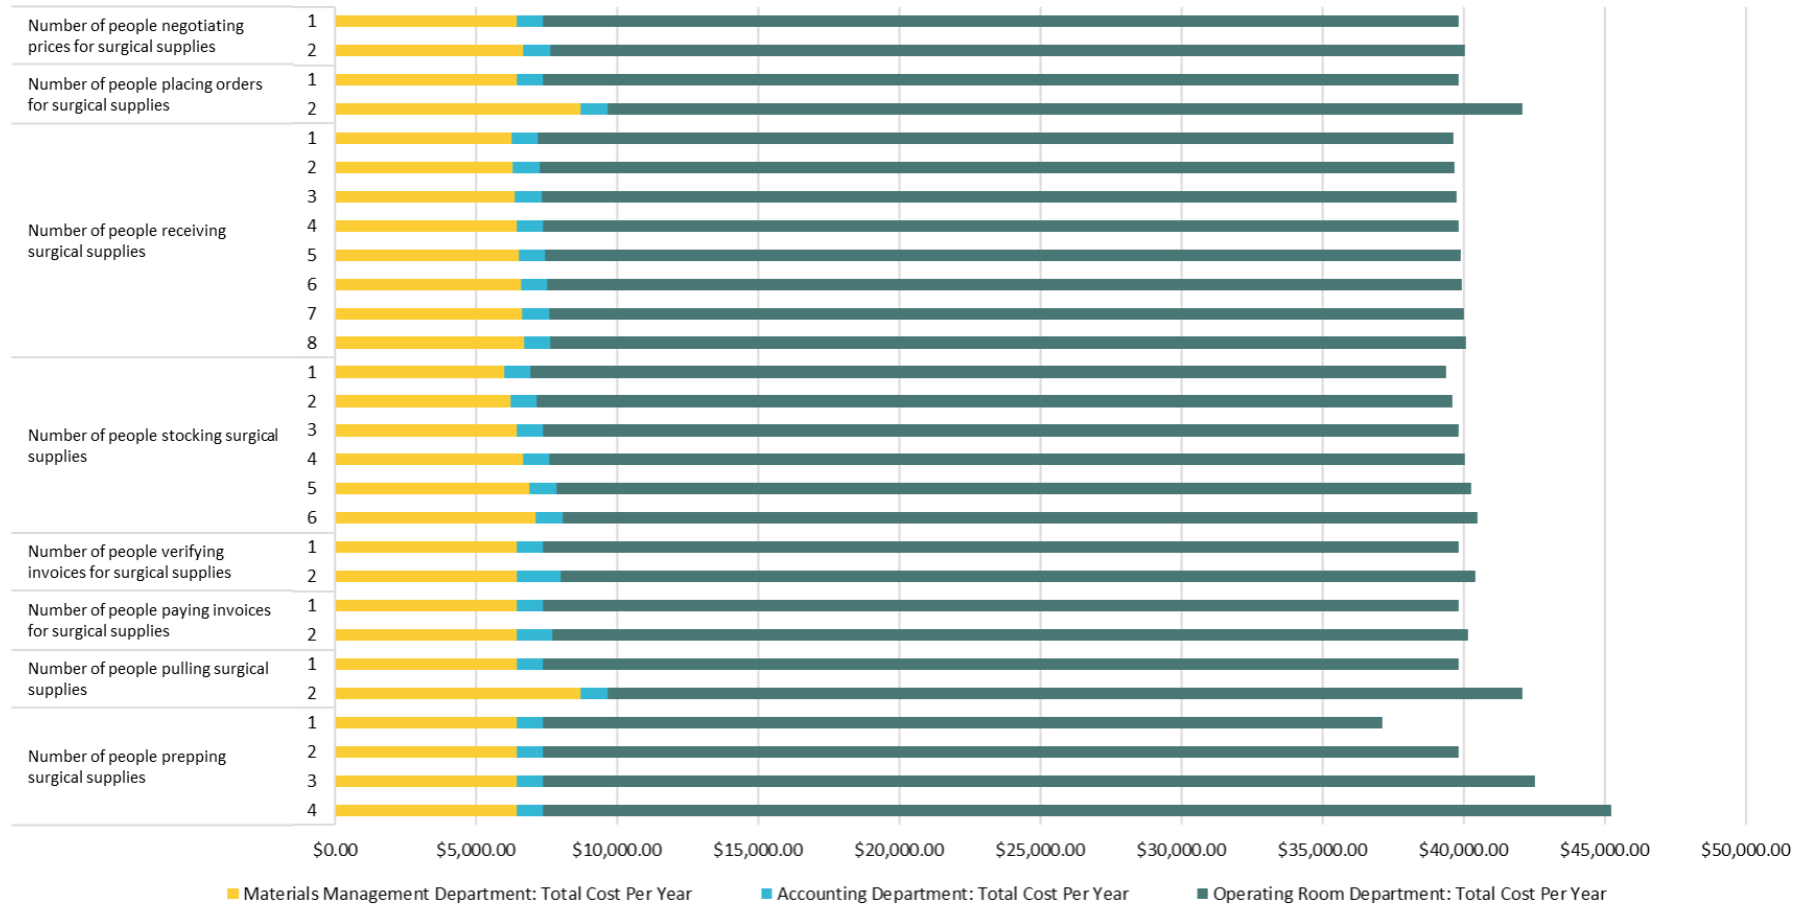

Notes: In cataract surgery, the hidden cost savings associated with most tasks are insensitive to changes to the number of personnel working on a task. The biggest variability is seen in placing orders, pulling supplies, and preparing supplies, which increase as personnel increases.

**Figure S4.** Sensitivity of Custom Pak Budget Impacts to Number of Personnel Changes for Retina Procedures in a Community Hospital

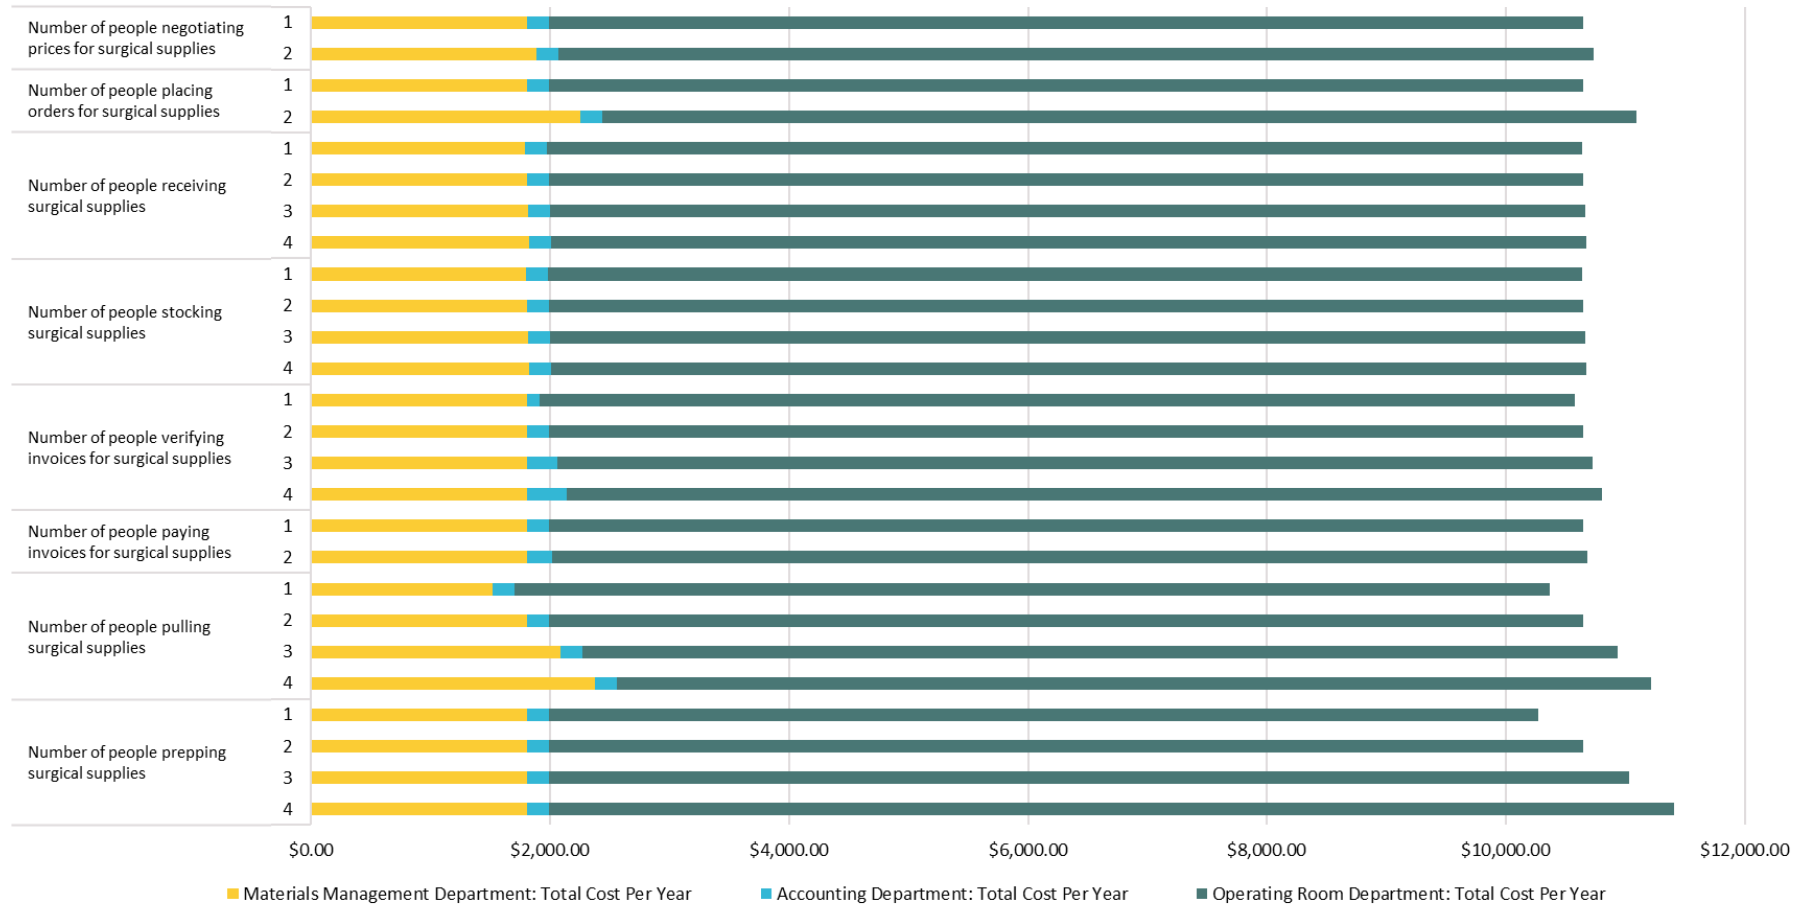

Notes: In surgical retina procedures, most tasks are performed by one or two people. Doubling the number of personnel increases Materials Management savings for placing orders and pulling supplies, while more personnel preparing supplies has greater hidden cost savings for the Operating Room.

**Figure S5.** Sensitivity of Custom Pak Budget Impacts to Changes in All Costs for Cataract Procedures in a Community Hospital

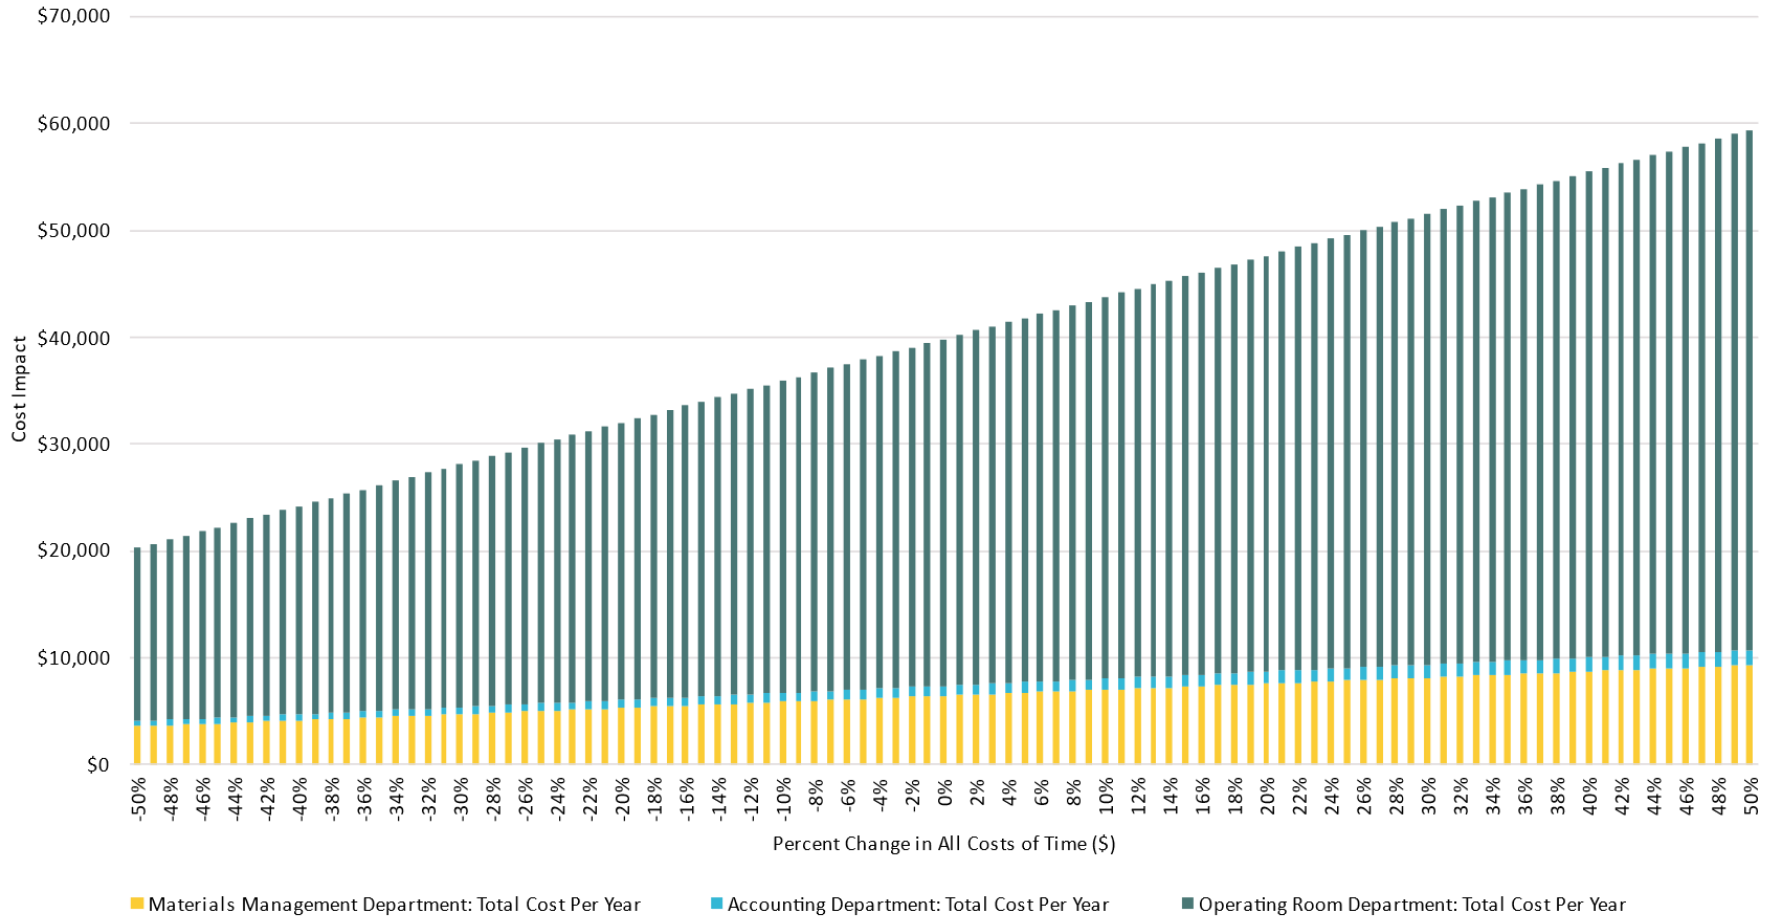

Notes: As facilities' costs per cataract case increase, the hidden cost savings from Custom Pak usage increase. While hidden cost savings decrease with per case cost, savings of \$20,000 are still present at a facility that has a per case cost 50% lower than the representative community hospital.

**Figure S6.** Sensitivity of Custom Pak Budget Impacts to Changes in All Costs for Retina Procedures in a Community Hospital

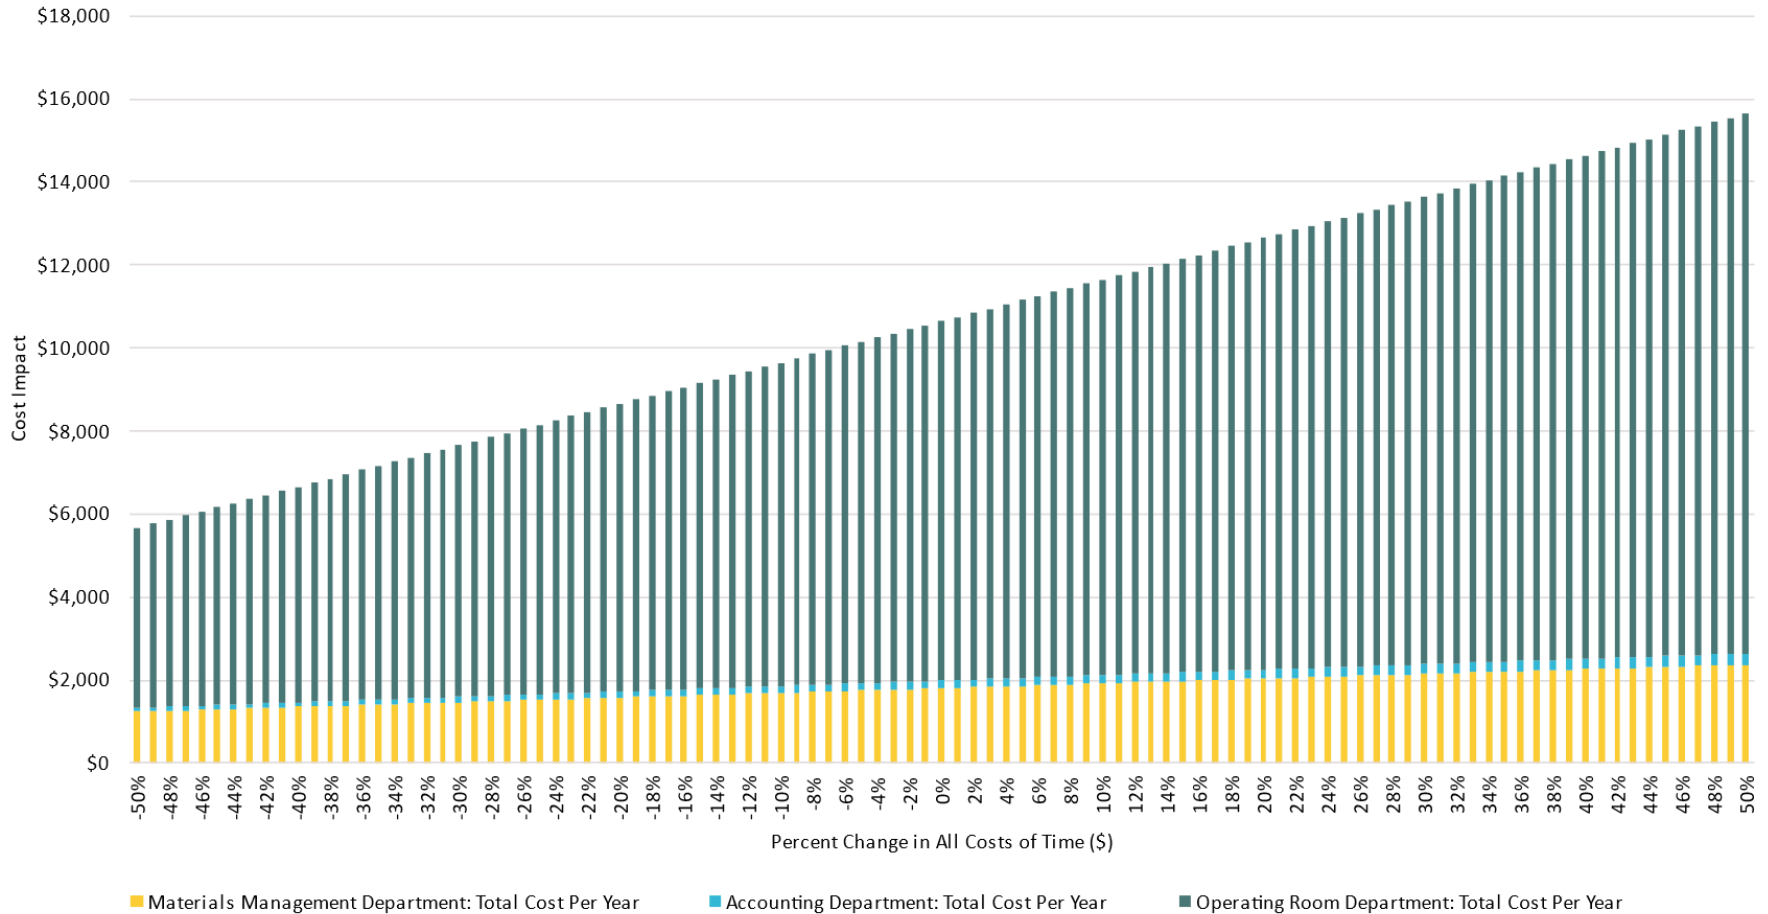

Notes: The per cost case of surgical retina procedures at community hospitals is linearly and positively correlated with the hidden cost savings from Custom Pak. A 50% increase in cost per case is associated with a 47% increase in hidden cost savings, while a 50% reduction in cost per case shows a 47% decrease in hidden cost savings relative to the representative community hospital.
